# Supplementary material for: Trophic upgrading and mobilization of wax esters in microzooplankton
Source: PubMed Central journal article supplement (PMC6705382; doi:10.7717/peerj.7549), 2019-08-19

0.1 Detector response units

A. Prey *Cryptomonas* sp.

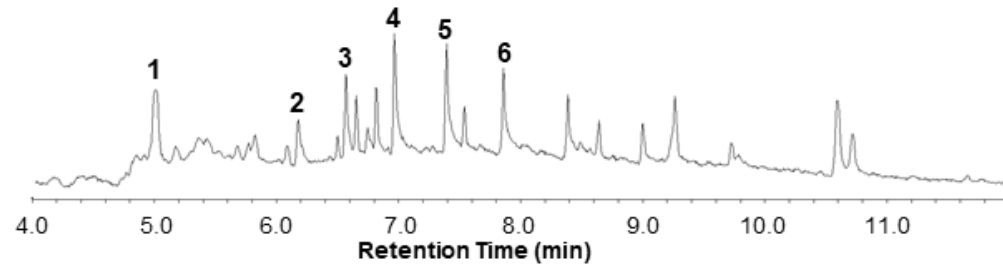

B. *O. marina* Active Feeding

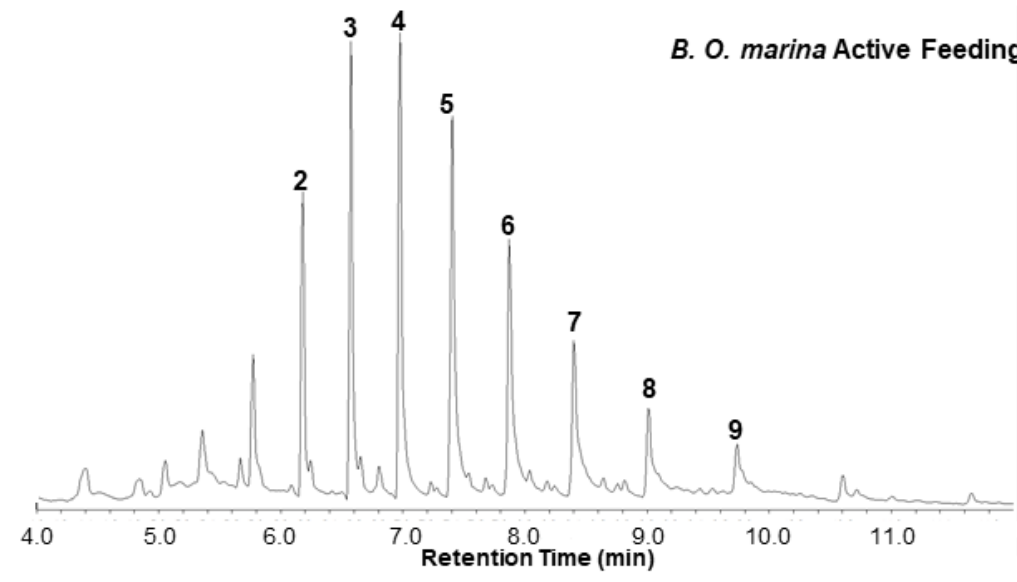

C. Day 15 Starvation

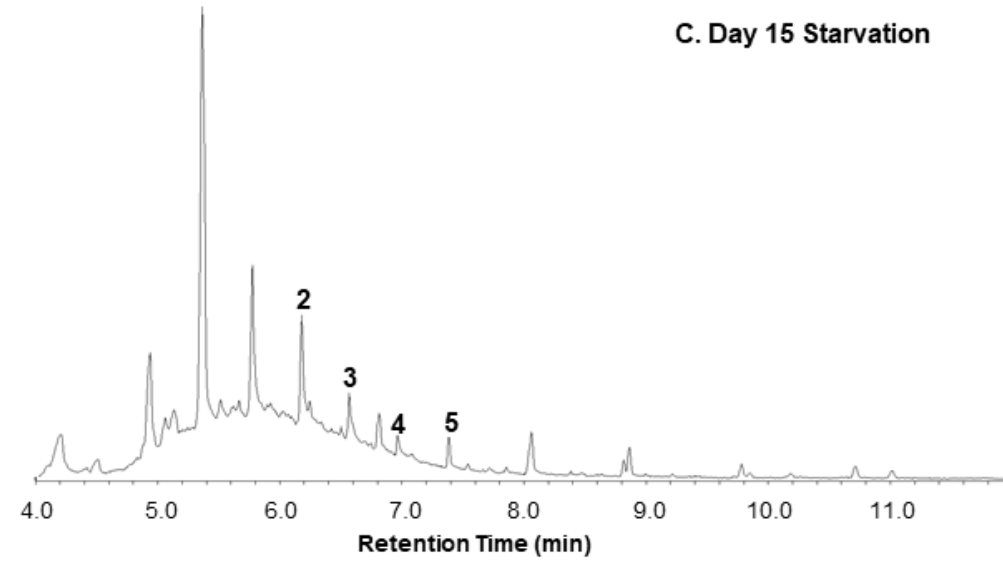

D. Day 20 Starvation

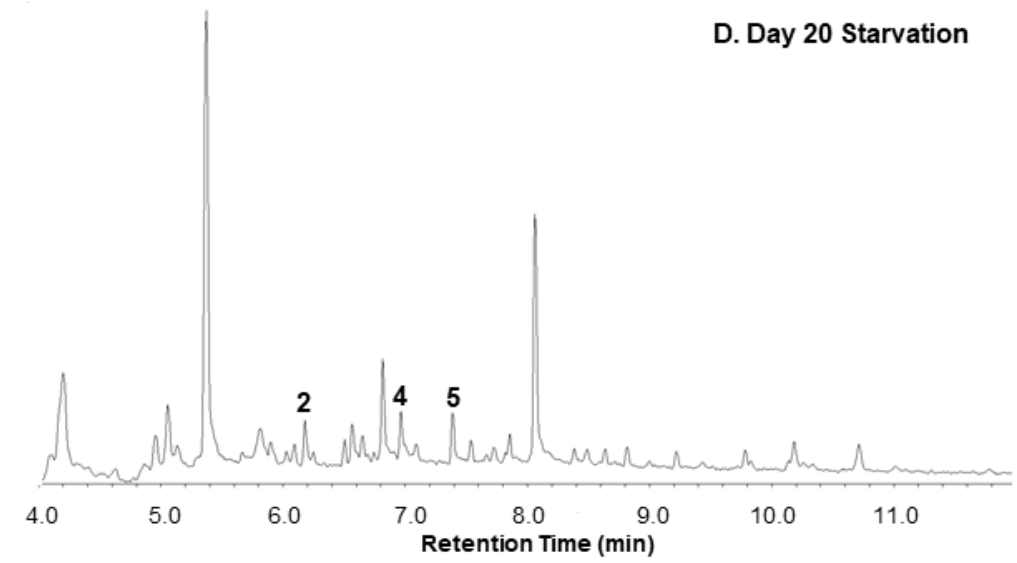

Supplement: peerj-07-7549-s002.pdf [file peerj-07-7549-s002.pdf]
